# Supplementary material
Source: publisher figshare collection journal article supplement (https://acs.figshare.com/ndownloader/files/4664716)
Supplement: Supplementary file 1 [file 4664716]

**Supporting Information for MS:**

## A new role for sulfur in arsenic cycling

Jenny C. Fisher<sup>†</sup>, Dirk Wallschläger<sup>‡</sup>, Britta Planer-Friedrich<sup>‡</sup>, and James T. Hollibaugh<sup>\*†</sup>

<sup>†</sup>Marine Sciences Department, University of Georgia, Athens, GA

<sup>‡</sup>Environmental and Resource Sciences Program, Trent University, Peterborough, ON

Number of pages: 10

Number of tables: 1

Number of figures: 5

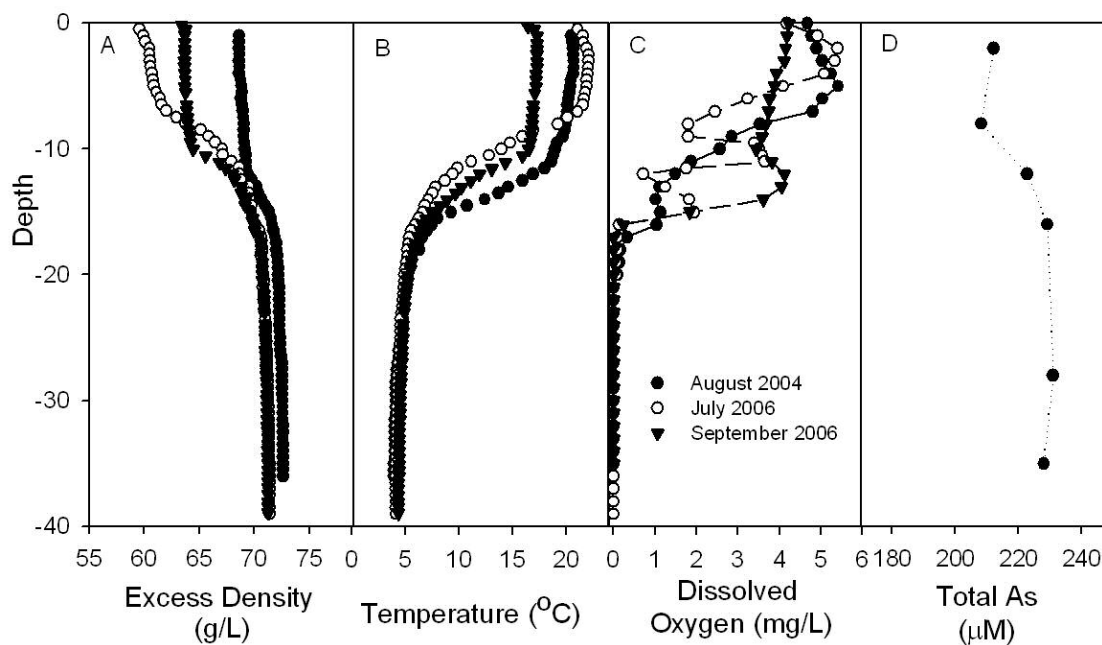

**Supporting Figure S1.** CTD measurements (excess density and temperature, A and B) and dissolved oxygen concentrations (C) from CTD casts taken in August 2004 (●), July 2006 (○), and September 2006 (▼). A set of samples from August 2004 was analyzed for total arsenic (●, D).

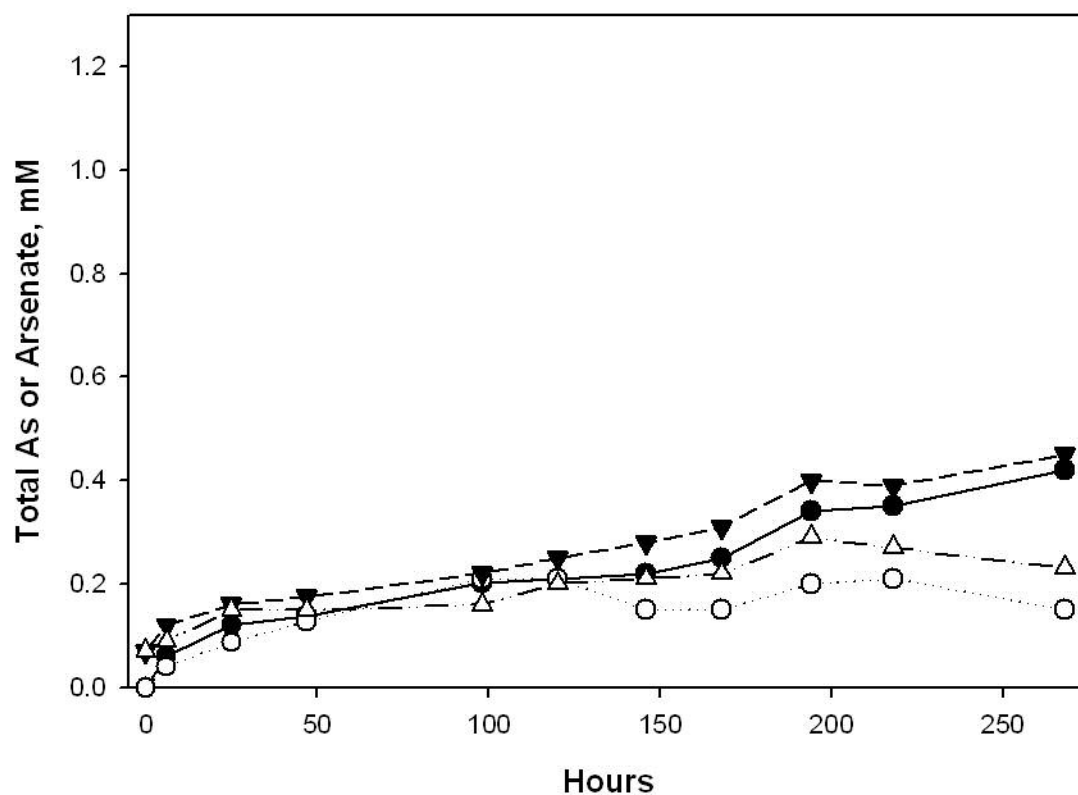

**Supporting Figure S2.** Comparison of arsenate production in Mono Lake water (MLW) or artificial Mono Lake water (AMLW) medium controls amended with 2 mM sulfide and 1 mM arsenite with or without formalin. Symbols: MLW, filtered ( $\Delta$ ); MLW with formalin ( $\blacktriangledown$ ); AMLW, filtered ( $\circ$ ); AMLW with formalin ( $\bullet$ ).

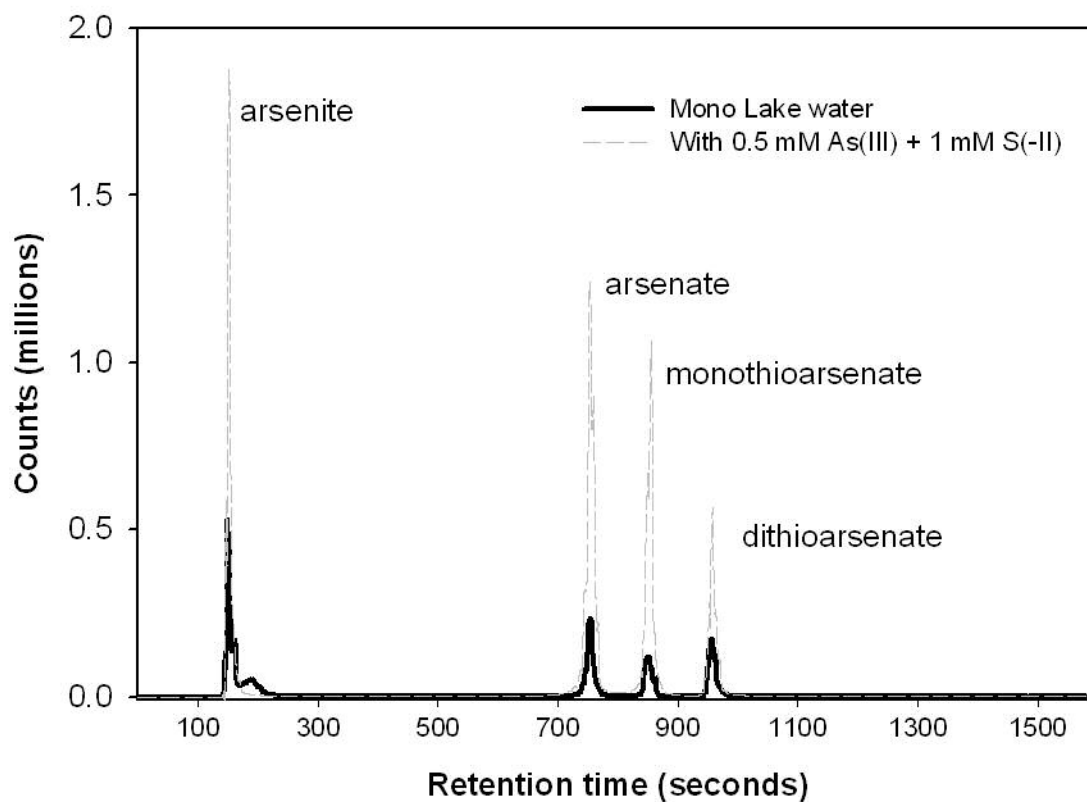

**Supporting Figure S3.** IC-ICP-MS chromatograms of an anoxic Mono Lake water sample (35m, September 2006; —) and the first sample from the second simulated mixing experiment (---).

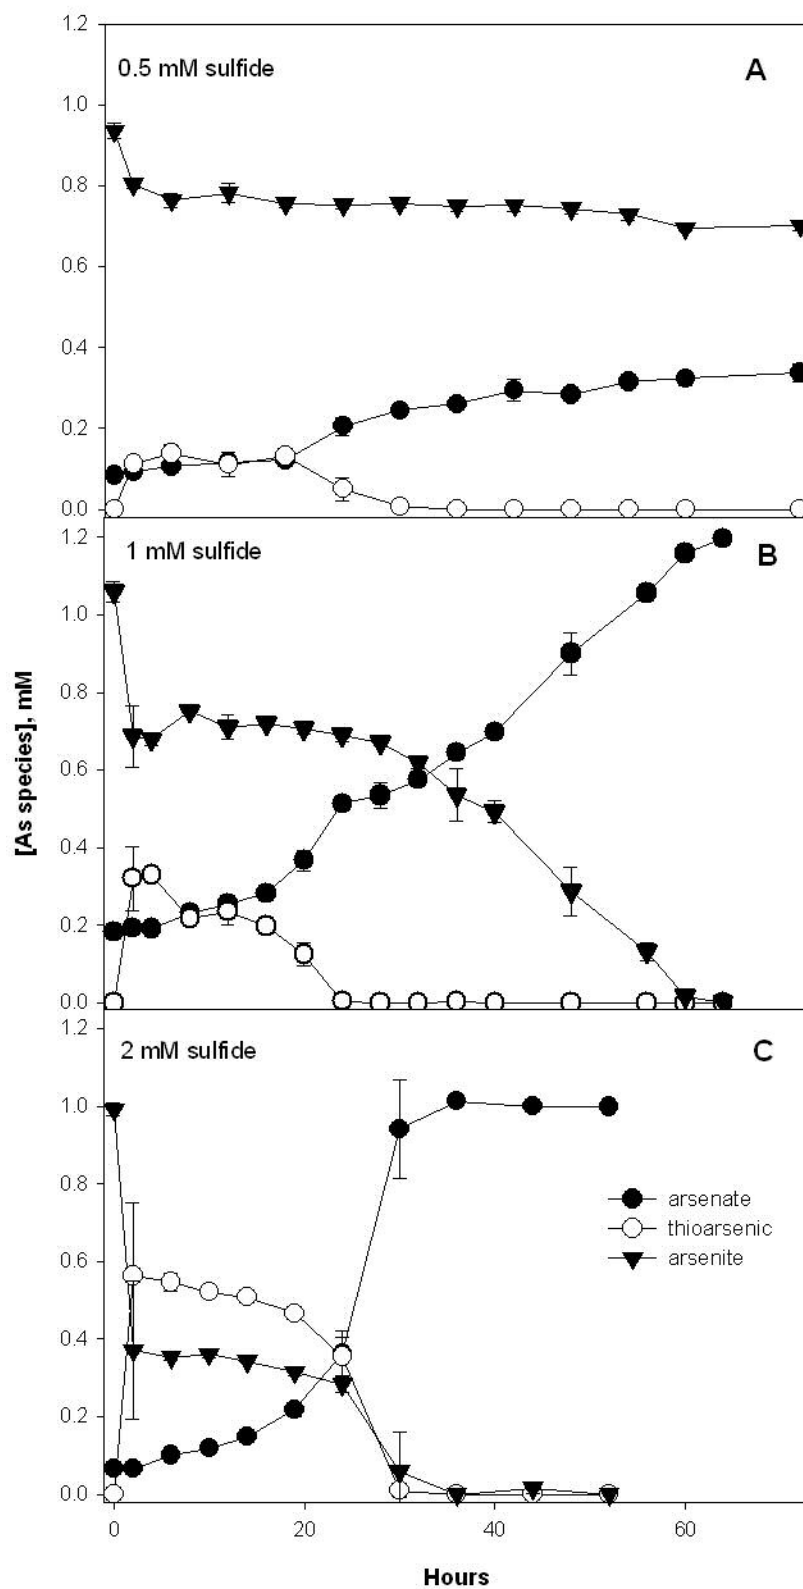

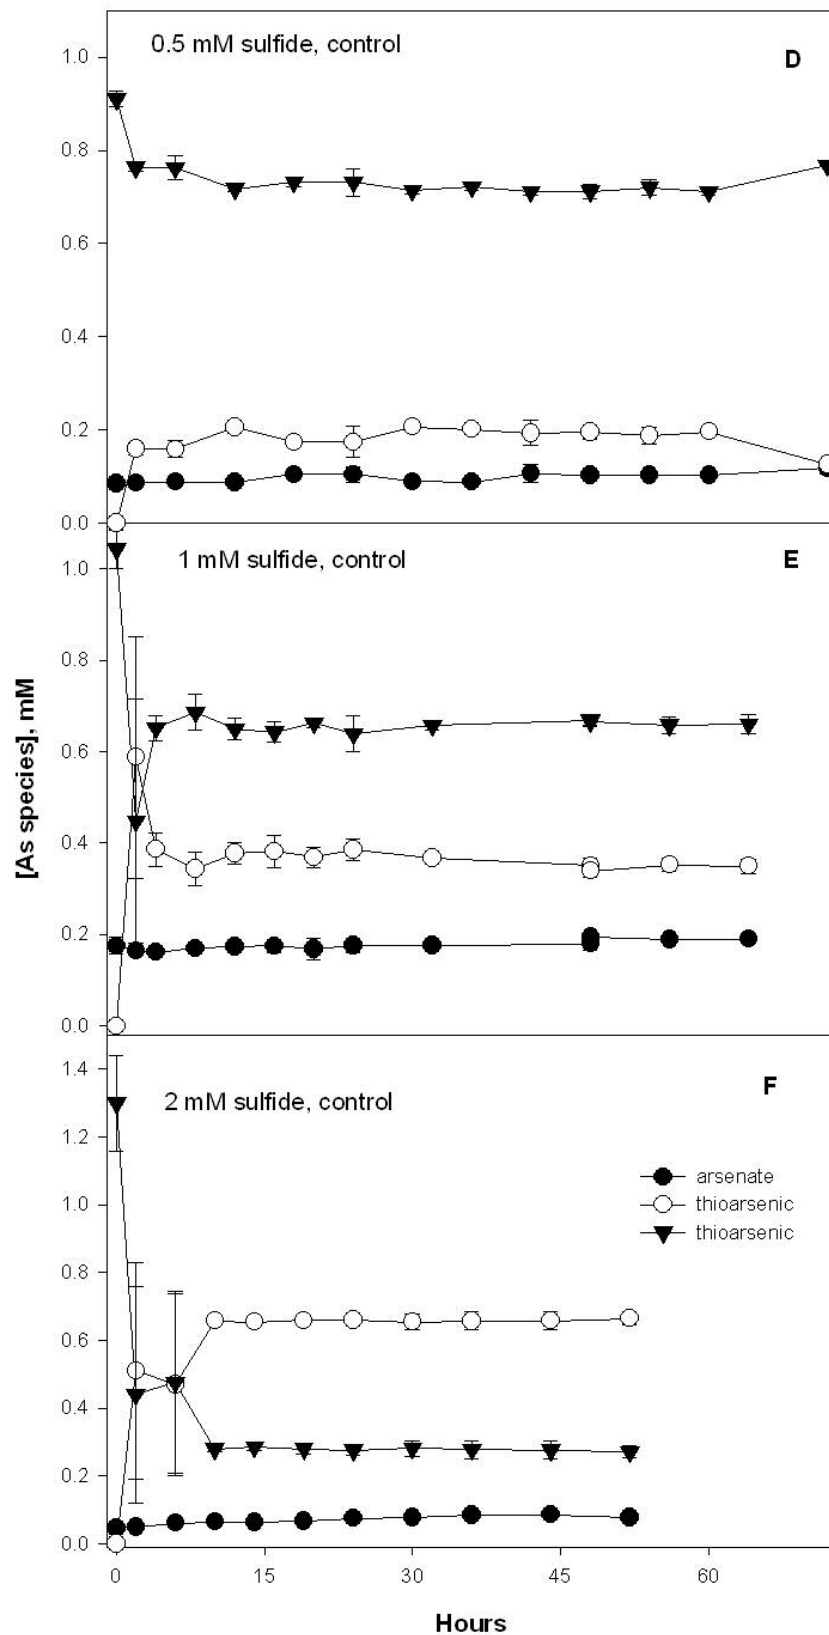

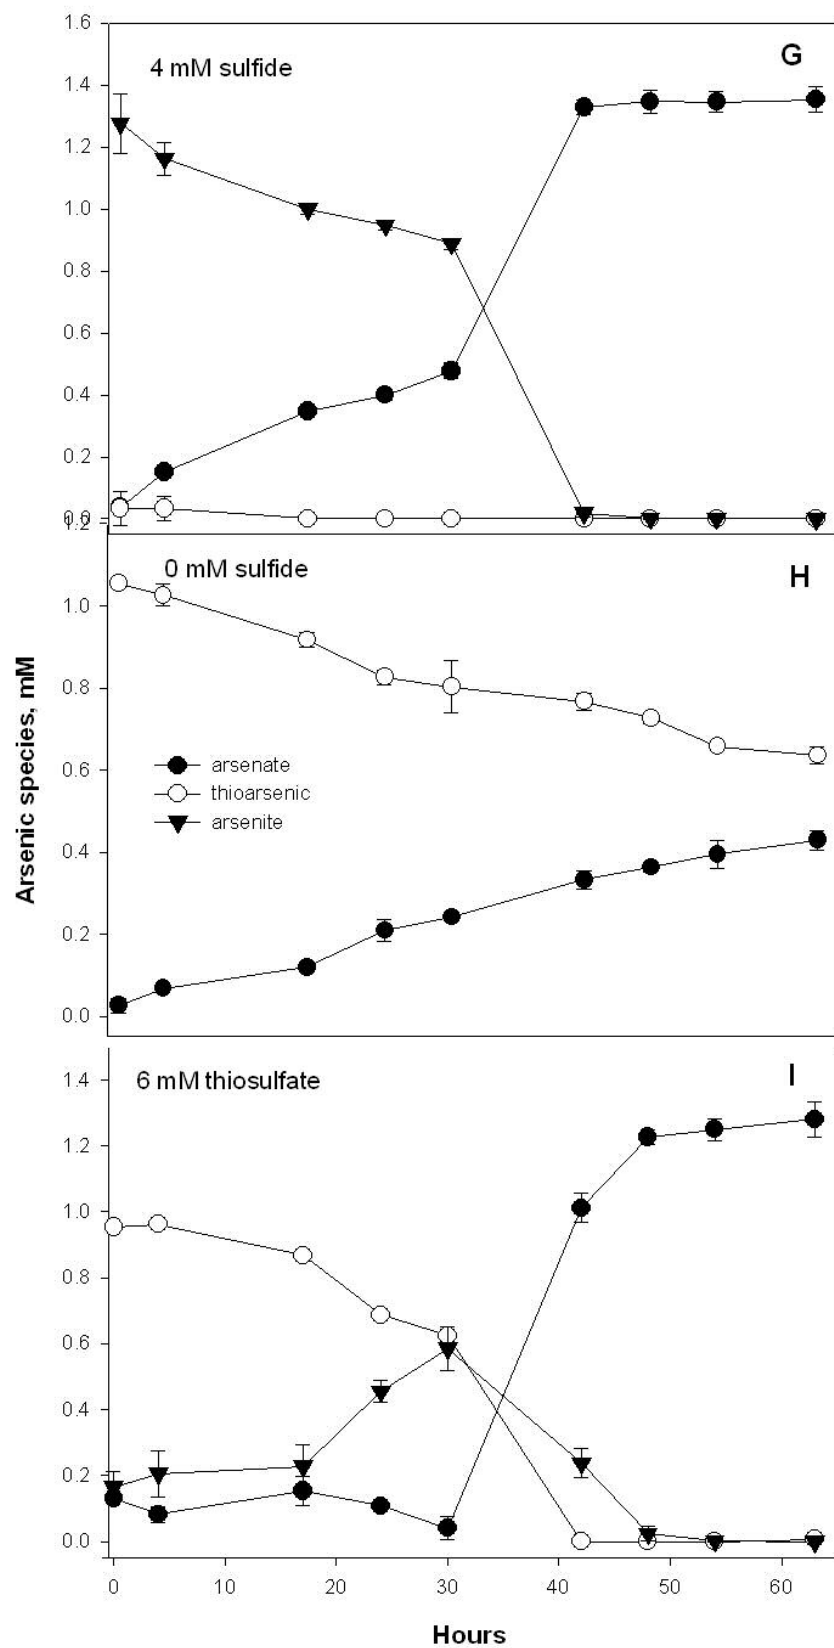

**Supporting Figure S4.** Arsenic speciation in enrichment culture experiments. Arsenate (●) and arsenite (▼) were measured by HPLC and thioarsenic (○) was determined by difference. Artificial Mono Lake water was amended with 1 mM arsenite and A) 0.5 mM sulfide and live inoculum, B) 1 mM sulfide and live inoculum, C) 2 mM sulfide and live inoculum, D) 0.5 mM sulfide (sterile control), E) 1 mM sulfide (sterile control), F) 2 mM sulfide (sterile control), G) 4 mM sulfide, H) no sulfide, or I) 6 mM thiosulfate.



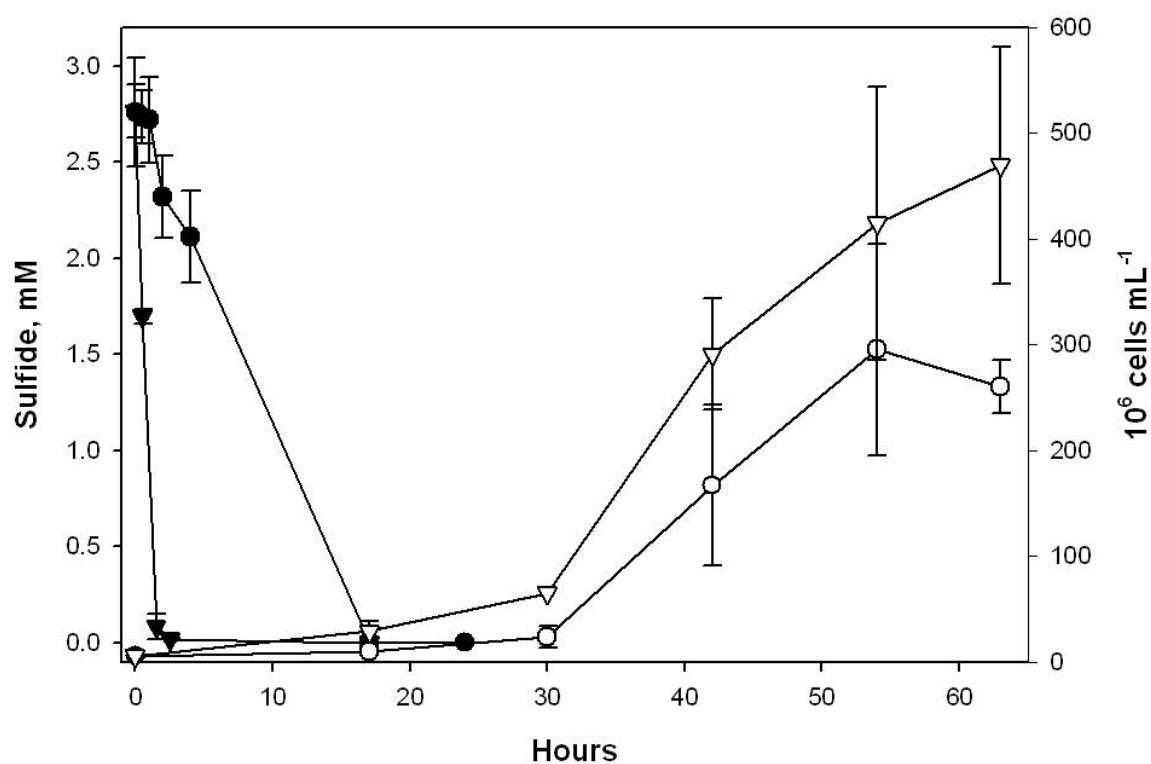

**Supporting Figure S5.** Sulfide was depleted rapidly (<24 hours) in the 4 mM sulfide + 1 mM arsenite treatment (As+S, ▼) and in the 4 mM sulfide only treatment (S, ●). Cell density in the As+S (Δ) and S (○) treatments increased significantly after sulfide was not detected, likely due to oxidation of polysulfides (S<sub>5</sub><sup>2-</sup>), thiosulfate, or sulfite.

Experiments were conducted in artificial Mono Lake water with a consortium of sulfoxidizing bacteria.

**Supporting Table S1. Description of clones from an arsenite and sulfide enrichment culture.**

| Sequence<br>(Accession number)   | Closest sequence<br>match<br>(% similarity)                     | Closest cultured<br>relative<br>(% similarity)      | Number of clones<br>represented by<br>sequence |
|----------------------------------|-----------------------------------------------------------------|-----------------------------------------------------|------------------------------------------------|
| MLAsHS-clone506-1<br>(EF643362)  | Uncultured gamma<br>proteobacterium clone<br>ML615J-17<br>(99%) | <i>Thioalkalivibrio<br/>jannaschii</i><br>(98%)     | 5                                              |
| MLAsHS-clone506-2<br>(EF643363)  | Uncultured gamma<br>proteobacterium clone<br>ML615J-17<br>(99%) | <i>Thioalkalivibrio<br/>versutus</i><br>(97%)       | 2                                              |
| MLAsHS-clone506-3<br>(EF643364)  | <i>Idiomarina</i> sp. G-<br>R2A15<br>(99%)                      | <i>Idiomarina salinae</i><br>strain ISL-52<br>(96%) | 1                                              |
| MLAsHS-clone506-8<br>(EF643369)  | Uncultured gamma<br>proteobacterium clone<br>ML623J-18<br>(96%) | <i>Thioalkalivibrio nitratis</i><br>(95%)           | 1                                              |
| MLAsHS-clone506-10<br>(EF643371) | <i>Arhodomonas</i> sp. EL-<br>201<br>(98%)                      | <i>Saccharospirillum<br/>impatiens</i><br>(98%)     | 1                                              |
